# Supplementary material for: Enhanced stability of CsPbBr3 nanocrystals through Al2O3 and polymer coating
Source: Royal Society of Chemistry journal article supplement (doi:10.1039/d3cp04768g), 2023-12-27
Supplement: d3cp04768g1.pdf [file d3cp04768g1.pdf]

## Enhanced Stability of CsPbBr<sub>3</sub> Nanocrystals through Al<sub>2</sub>O<sub>3</sub> and Polymer Coating

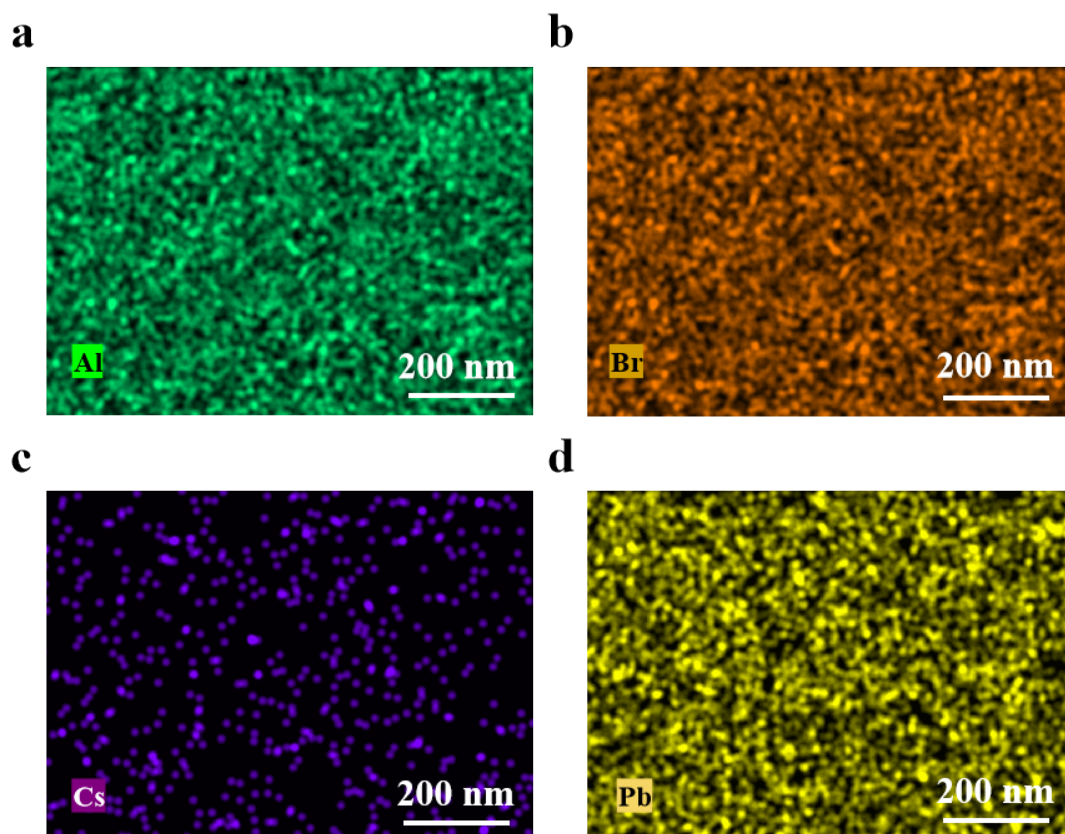

**Fig. S1.** EDS mapping images of (a) Al, (b) Br, (c) Cs and (d) Pb of CsPbBr<sub>3</sub>@Al<sub>2</sub>O<sub>3</sub>/EPDM.

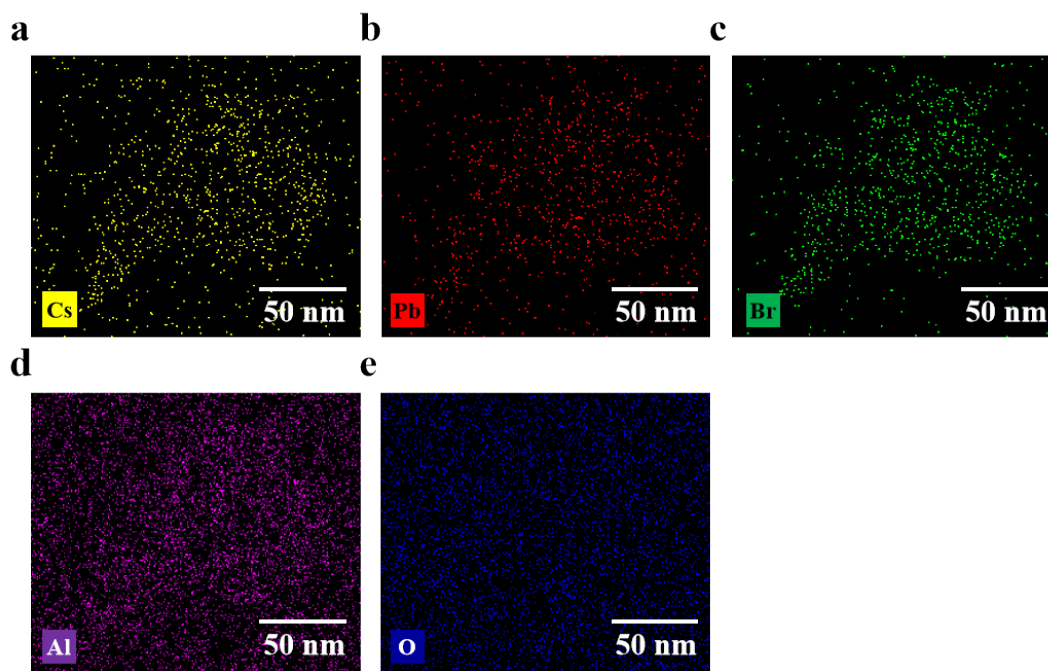

**Fig. S2.** EDS mapping images of (a) Cs, (b) Pb, (c) Br, (d) Al and (e) O in CsPbBr<sub>3</sub>@Al<sub>2</sub>O<sub>3</sub>/EPDM.

**a**

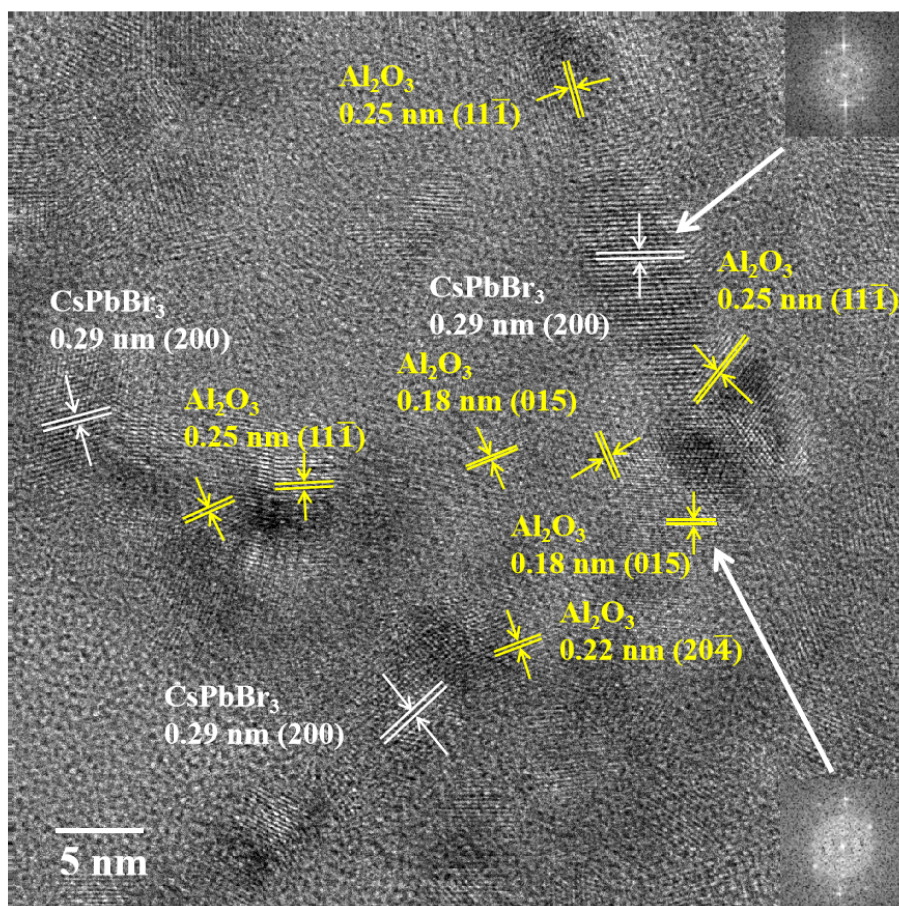

**Fig. S3.** (a) HRTEM image of CsPbBr<sub>3</sub>@Al<sub>2</sub>O<sub>3</sub>.

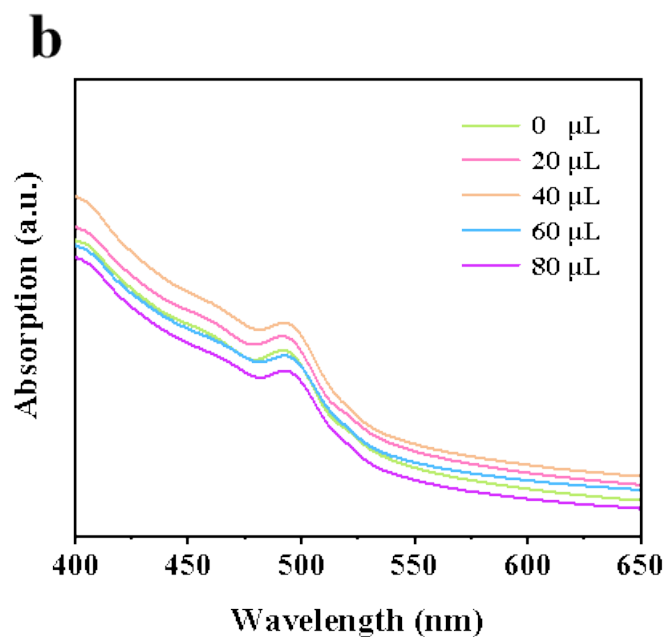

**Fig. S4.** (a) UV-Vis absorption spectra of CsPbBr<sub>3</sub>@Al<sub>2</sub>O<sub>3</sub>/EPDM with different triethyl aluminum additions.

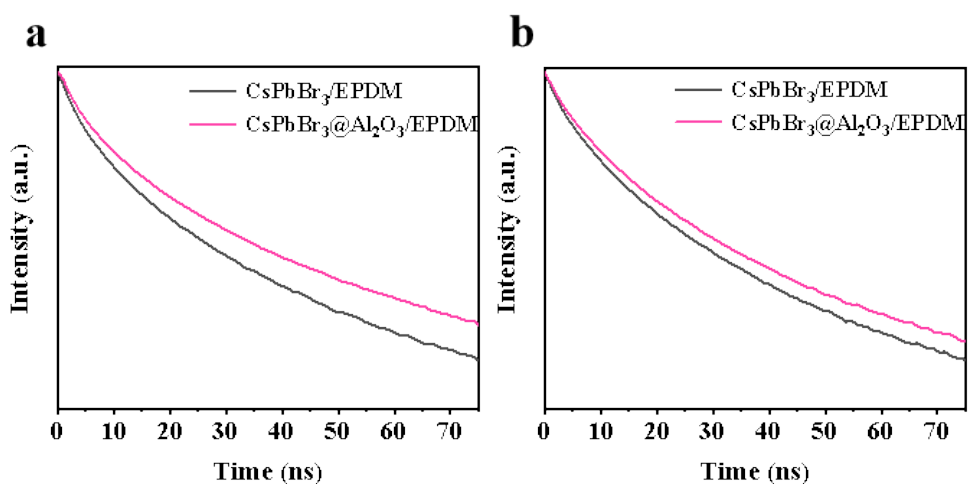

**Fig. S5.** (a) TRPL comparison chart when CsPbBr<sub>3</sub>@Al<sub>2</sub>O<sub>3</sub>/EPDM and CsPbBr<sub>3</sub>/EPDM were immersed in water for seven days. (b) TRPL comparison chart when CsPbBr<sub>3</sub>@Al<sub>2</sub>O<sub>3</sub>/EPDM and CsPbBr<sub>3</sub>/EPDM were immersed in water for fifteen days.

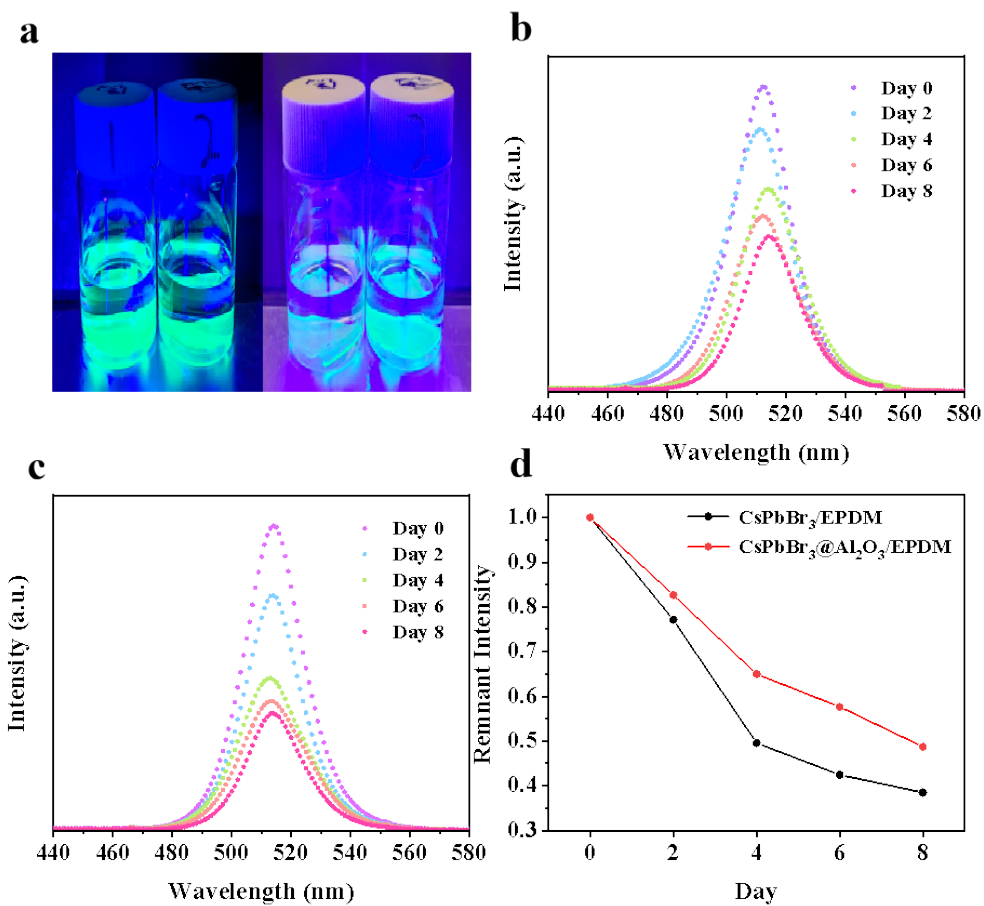

**Fig. S6.** (a) Macroscopic comparison of CsPbBr<sub>3</sub>/EPDM and CsPbBr<sub>3</sub>@Al<sub>2</sub>O<sub>3</sub>/EPDM before and after soaking in ethanol. (b) The emission spectra of CsPbBr<sub>3</sub>@Al<sub>2</sub>O<sub>3</sub>/EPDM. (c) The emission spectra of CsPbBr<sub>3</sub>/EPDM. (d) Scatter plot comparison.

### CsPbBr<sub>3</sub>

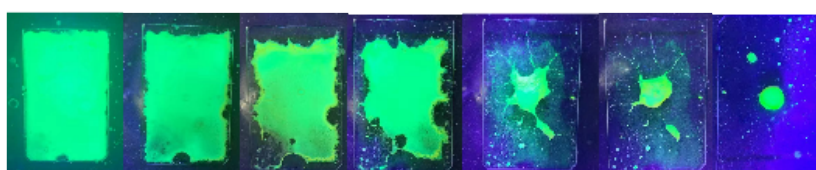

0 min 20 min 40 min 60 min 80 min 100 min 120 min

### CsPbBr<sub>3</sub>@Al<sub>2</sub>O<sub>3</sub>

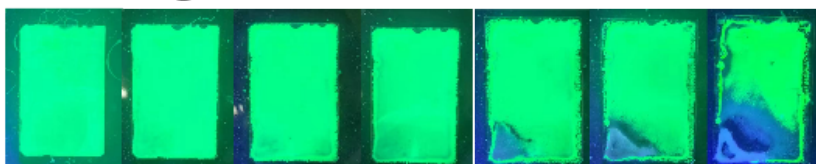

0 min 20 min 40 min 60 min 80 min 100 min 120 min

**Fig. S7.** Comparison between CsPbBr<sub>3</sub> and CsPbBr<sub>3</sub>@Al<sub>2</sub>O<sub>3</sub> immersed directly in water.

**Table. S1.** Calculation of average lifetime of PNCs films with or without C<sub>6</sub>H<sub>15</sub>Al.

| sample                                                                                   | A (%) | $\tau_1$ (ns) | B (%) | $\tau_2$ (ns) | $\tau_{ave}$ (ns) |
|------------------------------------------------------------------------------------------|-------|---------------|-------|---------------|-------------------|
| CsPbBr <sub>3</sub> /EPDM                                                                | 75.82 | 1.89          | 24.18 | 11.69         | 19.79             |
| CsPbBr <sub>3</sub> @Al <sub>2</sub> O <sub>3</sub> /EPDM (40 $\mu$ L triethyl aluminum) | 72.21 | 2.11          | 27.79 | 23.72         | 23.56             |

**Table. S2.** Calculation of average lifetime of CsPbBr<sub>3</sub>/EPDM and CsPbBr<sub>3</sub>@Al<sub>2</sub>O<sub>3</sub>/EPDM immersed in water.

|        | sample                                                    | A (%) | $\tau_1$ (ns) | B (%) | $\tau_2$ (ns) | $\tau_{ave}$ (ns) | $\lambda^2$ |
|--------|-----------------------------------------------------------|-------|---------------|-------|---------------|-------------------|-------------|
| Day 7  | CsPbBr <sub>3</sub> /EPDM                                 | 2.61  | 11.54         | 8.35  | 0.71          | 0.29              | 0.99        |
|        | CsPbBr <sub>3</sub> @Al <sub>2</sub> O <sub>3</sub> /EPDM | 3.61  | 16.26         | 11.04 | 0.76          | 0.24              | 0.99        |
| Day 15 | CsPbBr <sub>3</sub> /EPDM                                 | 2.49  | 10.41         | 7.74  | 0.68          | 0.32              | 0.99        |
|        | CsPbBr <sub>3</sub> @Al <sub>2</sub> O <sub>3</sub> /EPDM | 3.24  | 12.54         | 9.61  | 0.64          | 0.36              | 0.99        |

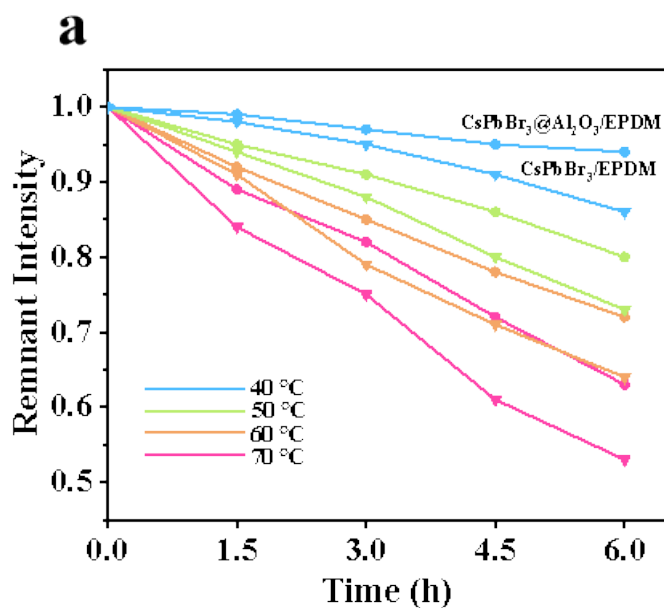**Fig. S8.** Comparison of attenuation trend of fluorescence intensity of CsPbBr<sub>3</sub>@Al<sub>2</sub>O<sub>3</sub>/EPDM and CsPbBr<sub>3</sub>/EPDM at different heating temperatures.



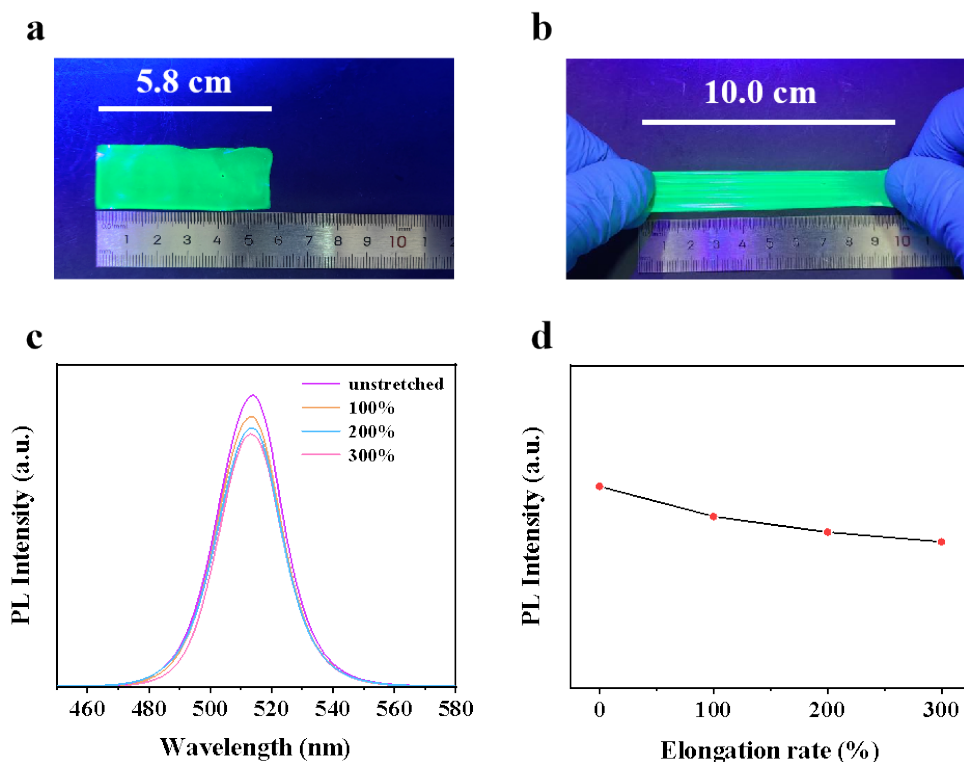

**Fig. S9.** (a) and (b) are pictures of CsPbBr<sub>3</sub>@Al<sub>2</sub>O<sub>3</sub>/EPDM before and after stretching. (c) Fluorescence spectra of CsPbBr<sub>3</sub>@Al<sub>2</sub>O<sub>3</sub>/EPDM at different tensile rates. (d) Line chart of the fluorescence intensity of CsPbBr<sub>3</sub>@Al<sub>2</sub>O<sub>3</sub>/EPDM with the change of the tensile rate.

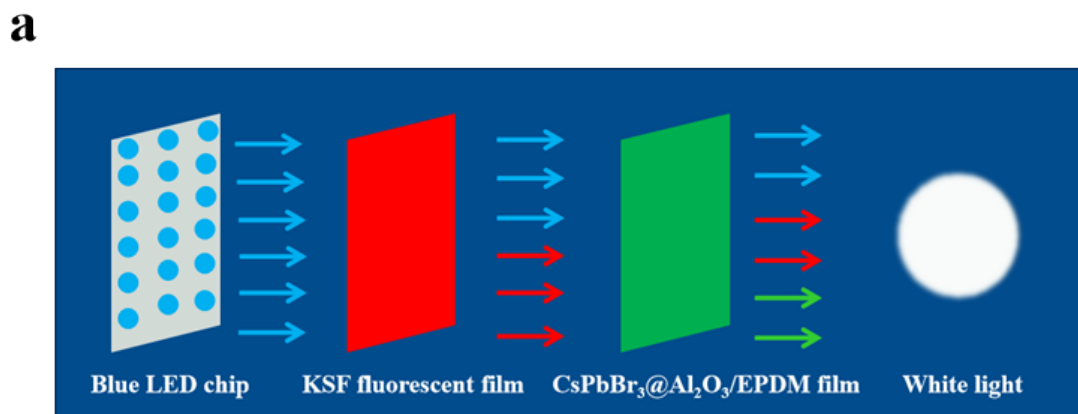

**Fig. S10.** (a) schematic diagram of white LED.

**Table. S3.** Color rendering index (CRI), correlated color temperature (CCT), color gamut and color coordinates of QDs LED

| sample                                                    | CRI | CCT/K | CIE(x,y)    | Color Gamut(NTSC) | Color Gamut(Rec.2020) |
|-----------------------------------------------------------|-----|-------|-------------|-------------------|-----------------------|
| CsPbBr <sub>3</sub> @Al <sub>2</sub> O <sub>3</sub> /EPDM | 57  | 5606  | (0.33,0.34) | 129%              | 95%                   |
